# Supplementary material for: The structure and magnetic properties of Fe3N as a photocatalyst applied in hydrogen generation induced by visible light
Source: Royal Society of Chemistry journal article supplement (doi:10.1039/c5ra12052g), 2015-01-01
Supplement: c5ra12052g1.pdf [file c5ra12052g1.pdf]

## **The Structure and Magnetic Properties of Fe<sub>3</sub>N as Photo-Catalyst Applied in Hydrogen Generation Induced by Visible Light**

Peng Zhang, Xiaobai Wang, Wei Wang, Xiang Lei, Wenxu Yin and Hua Yang\*

College of Chemistry, Jilin University, Changchun, 130012, China

Email: huayang86@sina.com

Fe<sub>3</sub>N and Fe<sub>3</sub>C synthesized from triethylamine

Fe<sub>3</sub>N and Fe<sub>3</sub>C from a triethylamine route were synthesized according to a previous literature<sup>1</sup>. Briefly, 4.15 mL triethylamine (TEA) was dissolved into 5.00 mL acetone, and then 0.81 g anhydrous ferric chloride was added into the solution. Then the black solution was dried for 24 h under the protection of nitrogen gas at room temperature. With continuous nitrogen flow, the as-synthesized precursor was calcinated to 560 and 600 °C for 30 min at the heating rate of 20 °C/min, and then cooled down to collect the product.

Fe<sub>3</sub>N and Fe<sub>3</sub>C synthesized from aniline

0.81 g anhydrous ferric chloride was dissolved into 5 mL acetone under the vigorous stirring. Then 15 mL aniline was rapidly added rapidly into the solution above. Next, the black solution was dried for 48 h with the protection of nitrogen gas. Further with the continuous nitrogen flow, the precursor was calcinated to 560 and 660 °C for 30 min at the heating ramp of 20 °C/min, respectively.

Fe<sub>3</sub>N and Fe<sub>3</sub>C synthesized from dicyandiamide

0.61 g dicyandiamide was dispersed into 10 mL acetone at 30 °C. Then 0.81 g anhydrous ferric chloride was added into the solution above under the vigorous stirring. Next, the red solution was dried for 48 h under the protection of nitrogen gas. Then with the continuous nitrogen flow, the precursor was calcinated to 560 and 680 °C for 30 min at the rate of 20 °C/min, respectively.

Fe<sub>3</sub>C synthesized from melamine

Fe<sub>3</sub>N and Fe<sub>3</sub>C from a triethylamine route were synthesized according to a previous literature<sup>2</sup>. Briefly, 2.70 g ferric chloride hexahydrate, 2.52 g melamine and 2.91 g hexadecyl trimethyl ammonium bromide were dissolved into a mixed solution with 20 mL distilled water and 20 mL ethanol. The solution above should be dried at 80 °C. The dried precursor was calcinated at 680 °C for 3 h with the heating rate of 20 °C/min.

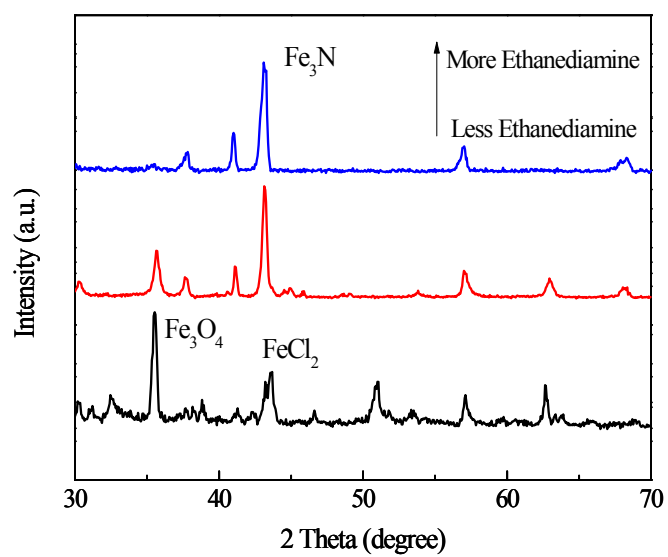

Figure S1 XRD patterns of calcinated product of the precursors prepared from different volumes of ethanediamine

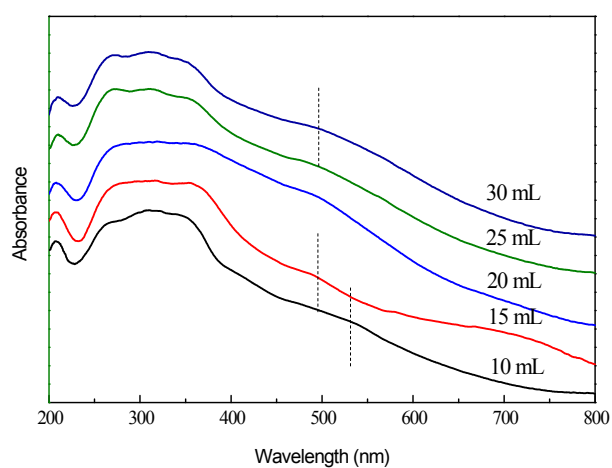

Figure S2 UV-vis absorption spectra of the precursors

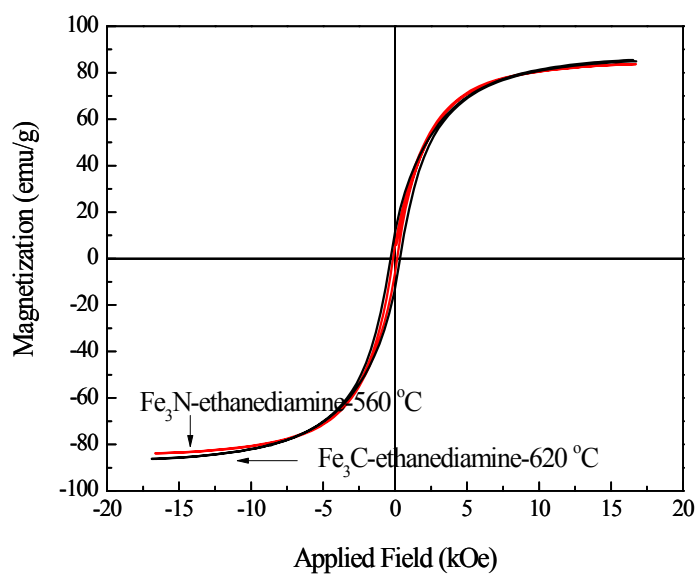

Figure S3 Hysteresis curves of calcinated product from the ethanediamine precursor

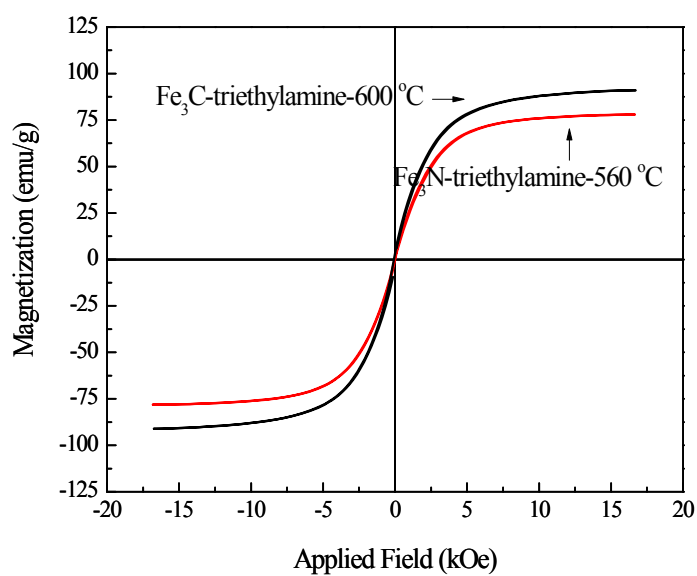

Figure S4 Hysteresis curves of calcinated product from the triethylamine precursor

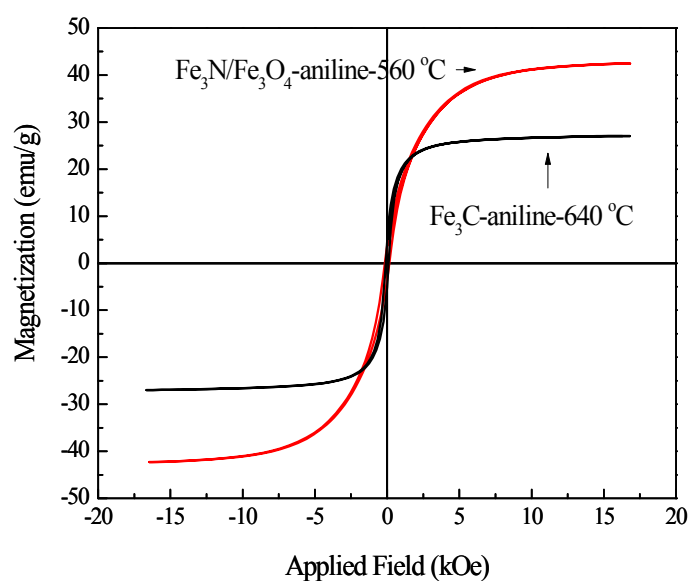

Figure S5 Hysteresis curves of calcinated product from the aniline precursor

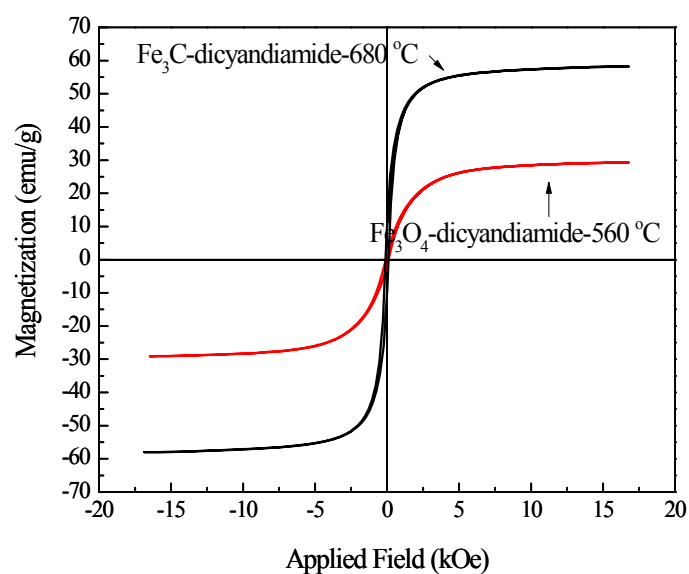

Figure S6 specific magnetization of calcinated product from dicyandiamide precursor

1. Zhang, P.; Wang, X.; Wang, W.; Lei, X.; Yang, H., Magnetic and hydrazine-decomposition catalytic properties of [varepsilon]-Fe<sub>3</sub>N synthesized from a novel precursor. *Journal of Materials Chemistry A* **2015**, *3* (12), 6464-6469.
2. Wang, X.; Zhang, P.; Gao, J.; Chen, X.; Yang, H., Facile synthesis and magnetic properties of Fe<sub>3</sub>C/C nanoparticles via a sol-gel process. *Dyes and Pigments* **2015**, *112* (0), 305-310.
